# Supplementary material
Source: HighWire-hosted journal article supplement (https://www.rcpjournals.org/highwire/filestream/10814/field_highwire_adjunct_files/0/Chan_Supplementary_S1.pdf)
Supplement: Chan_Supplementary_S1.pdf [file Chan_Supplementary_S1.pdf]

## S1. Full search strategy for this literature review

HDAS Export

Search Strategy Lilian Chan - chest compression and aerosol generating procedures

22 Apr 20 -  
14:29

Strategy 841181

| #  | Database | Search term                                           | Results |
|----|----------|-------------------------------------------------------|---------|
| 1  | Medline  | (chest ADJ3 compression*).ti,ab                       | 3995    |
| 2  | Medline  | (CPR).ti,ab                                           | 11939   |
| 3  | Medline  | "CARDIOPULMONARY RESUSCITATION"/                      | 16919   |
| 4  | Medline  | (cardiopulmonary ADJ3 resuscitat*).ti,ab              | 14604   |
| 5  | Medline  | (1 OR 2 OR 3 OR 4)                                    | 28964   |
| 6  | Medline  | (aerosol generating procedure*).ti,ab                 | 85      |
| 7  | Medline  | (aerosol generat*).ti,ab                              | 3599    |
| 8  | Medline  | (AGP*).ti,ab                                          | 4633    |
| 9  | Medline  | (6 OR 7 OR 8)                                         | 8225    |
| 10 | Medline  | (5 AND 9)                                             | 5       |
| 11 | EMBASE   | (chest ADJ3 compression*).ti,ab                       | 6461    |
| 12 | EMBASE   | RESUSCITATION/                                        | 108815  |
| 13 | EMBASE   | (CPR).ti,ab                                           | 21387   |
| 14 | EMBASE   | (cardiopulmonary ADJ3 resuscitat*).ti,ab              | 20146   |
| 15 | EMBASE   | (11 OR 12 OR 13 OR 14)                                | 118743  |
| 16 | EMBASE   | (aerosol generating procedure*).ti,ab                 | 71      |
| 17 | EMBASE   | (aerosol generat*).ti,ab                              | 1190    |
| 18 | EMBASE   | (AGP*).ti,ab                                          | 5240    |
| 19 | EMBASE   | (16 OR 17 OR 18)                                      | 6420    |
| 20 | EMBASE   | (15 AND 19)                                           | 21      |
| 21 | CINAHL   | (chest ADJ3 compression*).ti,ab                       | 2254    |
| 22 | CINAHL   | (CPR).ti,ab                                           | 6410    |
| 23 | CINAHL   | "RESUSCITATION, CARDIOPULMONARY"/ OR "BYSTANDER CPR"/ | 14017   |

|    |        |                                          |       |
|----|--------|------------------------------------------|-------|
| 24 | CINAHL | (cardiopulmonary ADJ3 resuscitat*).ti,ab | 7203  |
| 25 | CINAHL | (21 OR 22 OR 23 OR 24)                   | 18975 |
| 26 | CINAHL | (aerosol generating procedure*).ti,ab    | 47    |
| 27 | CINAHL | (aerosol generat*).ti,ab                 | 460   |
| 28 | CINAHL | (AGP*).ti,ab                             | 406   |
| 29 | CINAHL | (26 OR 27 OR 28)                         | 862   |
| 30 | CINAHL | (25 AND 29)                              | 2     |
| 31 | BNI    | (aerosol generating procedure*).ti,ab    | 11    |
| 32 | BNI    | (aerosol generat*).ti,ab                 | 24    |
| 33 | BNI    | (AGP*).ti,ab                             | 33    |
| 34 | BNI    | (31 OR 32 OR 33)                         | 55    |
| 35 | BNI    | (chest ADJ3 compress*).ti,ab             | 192   |
| 36 | BNI    | (CPR).ti,ab                              | 747   |
| 37 | BNI    | "CARDIOPULMONARY RESUSCITATION--CPR"     | 2266  |
| 38 | BNI    | (cardiopulmonary ADJ3 resuscitat*).ti,ab | 1085  |
| 39 | BNI    | (35 OR 36 OR 37 OR 38)                   | 2952  |
| 40 | BNI    | (34 AND 39)                              | 0     |
| 41 | HMIC   | (aerosol generating procedure*).ti,ab    | 9     |
| 42 | HMIC   | (aerosol generat*).ti,ab                 | 15    |
| 43 | HMIC   | (AGP*).ti,ab                             | 5     |
| 44 | HMIC   | (41 OR 42 OR 43)                         | 19    |
| 45 | HMIC   | (chest ADJ3 compress*).ti,ab             | 10    |
| 46 | HMIC   | (CPR).ti,ab                              | 94    |
| 47 | HMIC   | (cardiopulmonary ADJ3 resuscitat*).ti,ab | 144   |
| 48 | HMIC   | (45 OR 46 OR 47)                         | 182   |
| 49 | HMIC   | (44 AND 48)                              | 0     |

PubMed search query, 22 April 2020

Recent queries

| Search              | Add to builder      | Query                                                                                                                                          | Items found           | Time     |
|---------------------|---------------------|------------------------------------------------------------------------------------------------------------------------------------------------|-----------------------|----------|
| <a href="#">#15</a> | <a href="#">Add</a> | Search <b>(#8 AND #14)</b>                                                                                                                     | <a href="#">4</a>     | 09:43:18 |
| <a href="#">#14</a> | <a href="#">Add</a> | Search <b>(#9 or #10 or #11 or #12 or #13)</b>                                                                                                 | <a href="#">5554</a>  | 09:42:53 |
| <a href="#">#13</a> | <a href="#">Add</a> | Search <b>AGP*</b>                                                                                                                             | <a href="#">4897</a>  | 09:42:13 |
| <a href="#">#12</a> | <a href="#">Add</a> | Search <b>aerosol generat*</b>                                                                                                                 | <a href="#">664</a>   | 09:42:07 |
| <a href="#">#11</a> | <a href="#">Add</a> | Search <b>(("aerosol generating" OR "aerosol generating activities" OR "aerosol generating procedure" OR "aerosol generating procedures"))</b> | <a href="#">133</a>   | 09:41:51 |
| <a href="#">#10</a> | <a href="#">Add</a> | Search <b>("aerosol generating procedures and risk of transmission of acute respiratory infections a systematic review")</b>                   | <a href="#">1</a>     | 09:40:59 |
| <a href="#">#9</a>  | <a href="#">Add</a> | Search <b>aerosol generating procedure*</b>                                                                                                    | <a href="#">74</a>    | 09:40:25 |
| <a href="#">#8</a>  | <a href="#">Add</a> | Search <b>(#2 or #3 or #4 or #5 or #6 or #7)</b>                                                                                               | <a href="#">31177</a> | 09:40:00 |
| <a href="#">#7</a>  | <a href="#">Add</a> | Search <b>"cardiopulmonary resuscitation"</b>                                                                                                  | <a href="#">23853</a> | 09:38:44 |
| <a href="#">#6</a>  | <a href="#">Add</a> | Search <b>cardiopulmonary resuscitat*</b>                                                                                                      | <a href="#">23876</a> | 09:38:05 |
| <a href="#">#5</a>  | <a href="#">Add</a> | Search <b>CPR</b>                                                                                                                              | <a href="#">30406</a> | 09:37:36 |
| <a href="#">#4</a>  | <a href="#">Add</a> | Search <b>chest compression*</b>                                                                                                               | <a href="#">3729</a>  | 09:36:57 |
| <a href="#">#3</a>  | <a href="#">Add</a> | Search <b>chest compress*</b>                                                                                                                  | <a href="#">3746</a>  | 09:36:38 |
| <a href="#">#2</a>  | <a href="#">Add</a> | Search <b>"chest compression"</b>                                                                                                              | <a href="#">2266</a>  | 09:36:22 |
